# Supplementary material for: Evolutionary Pattern and Regulation Analysis to Support Why Diversity Functions Existed within PPAR Gene Family Members
Source: Hindawi journal article supplement (doi:10.1155/2015/613910), 2015-01-01
Supplement: f1 [file 613910.f1.pdf]

**Table S1 Gene accession numbers in GenBank**

| Gene name         | Specie name                 | GenBank GIEST  | Nucleotide length | Protein length |
|-------------------|-----------------------------|----------------|-------------------|----------------|
| PPAR $\alpha$     | Homosapiens                 | Y07619.1       | 1407              | 468            |
|                   | Macaca mulatta              | NM_001033029.1 | 1404              | 467            |
|                   | Gorilla gorilla gorilla     | XM_004063652.1 | 9881              | 468            |
|                   | Xenopus laevis              | NM_001089813.1 | 3355              | 474            |
|                   | Danio rerio                 | DQ839548.1     | 1380              | 459            |
|                   | Salmo salar                 | NM_001123560.1 | 1644              | 464            |
|                   | Odobenus rosmarus divergens | XM_004415835.1 | 2002              | 468            |
|                   | Orcinus orca                | XM_004279591.1 | 1932              | 469            |
|                   | Tursiops truncatus          | XM_004322234.1 | 1802              | 469            |
|                   | Gallus                      | NM_001001464.1 | 2100              | 468            |
|                   | Anser anser                 | AF481797.1     | 1455              | 468            |
|                   | Anas platyrhynchos          | EF534215.1     | 1430              | 468            |
|                   | Felis catus                 | XM_003989394.1 | 1420              | 468            |
|                   | Canis lupus familiaris      | NM_001003093.1 | 2032              | 468            |
|                   | Oryctolagus cuniculus       | XM_002723354.1 | 1407              | 468            |
|                   | Mustela putorius furo       | XM_004813909.1 | 8279              | 468            |
|                   | Equus caballus              | NM_001242553.1 | 1763              | 468            |
|                   | Ovis aries                  | XM_004007050.1 | 1445              | 470            |
|                   | Bos taurus                  | NM_001034036.1 | 1979              | 470            |
|                   | Bubalus bubalis             | JQ070333.1     | 1548              | 470            |
|                   | Sus scrofa                  | NM_001044526.1 | 1488              | 468            |
|                   | Ceratotherium simum simum   | XM_004437986.1 | 1803              | 467            |
|                   | Loxodonta africana          | XM_003420893.1 | 1407              | 468            |
|                   | Mus musculus                | BC016892.1     | 2336              | 468            |
| Rattus norvegicus | NM_013196.1                 | 2022           | 468               |                |
| Cavia porcellus   | NM_001173004.1              | 2073           | 467               |                |
| Octodon degus     | XM_004642403.1              | 1404           | 467               |                |
| PPAR $\beta$      | Homosapiens                 | AY919140.1     | 1326              | 441            |
|                   | Gorilla gorilla gorilla     | XM_004043869.1 | 3454              | 343            |
|                   | Pan troglodytes             | XM_003311239.1 | 3425              | 402            |
|                   | Xenopus laevis              | NM_001087841.1 | 1537              | 396            |
|                   | Danio rerio                 | NM_131468.2    | 3219              | 517            |
|                   | Gallus                      | NM_204728.1    | 1756              | 443            |
|                   | Anas platyrhynchos          | XM_005023480.1 | 2268              | 345            |
|                   | Canis lupus familiaris      | NM_001048102.1 | 1864              | 459            |
|                   | Oryctolagus cuniculus       | NM_001082000.1 | 1326              | 441            |
|                   | Dasyus novemcinctus         | XM_004458309.1 | 2521              | 442            |
|                   | Equus caballus              | XM_001498870.3 | 1375              | 402            |
|                   | Bos taurus                  | NM_001083636.1 | 3300              | 441            |
|                   | Sus scrofa                  | GU565977.1     | 2717              | 441            |

|               |                        |                |      |     |
|---------------|------------------------|----------------|------|-----|
|               | Mus musculus           | U10375.1       | 1323 | 440 |
|               | Rattus norvegicus      | U75918.1       | 1975 | 440 |
|               | Cavia porcellus        | XM_003473900.2 | 3245 | 440 |
| PPAR $\gamma$ | Homo sapiens           | X90563.1       | 1766 | 477 |
|               | Macaca mulatta         | NM_001032860.1 | 1759 | 505 |
|               | Nomascus leucogenys    | XM_004091756.1 | 1663 | 483 |
|               | Pan troglodytes        | XM_003950030.1 | 1663 | 483 |
|               | Xenopus laevis         | NM_001087843.1 | 2046 | 477 |
|               | Danio rerio            | NM_131467.1    | 1994 | 527 |
|               | Salmo salar            | NM_001123546.1 | 2528 | 544 |
|               | Gallus                 | NM_001001460.1 | 2089 | 475 |
|               | Anas platyrhynchos     | EF546801.2     | 1650 | 475 |
|               | Ficedula albicollis    | XM_005052821.1 | 4207 | 475 |
|               | Felis catus            | NM_001113176.1 | 1841 | 529 |
|               | Canis lupus familiaris | NM_001024632.2 | 1830 | 529 |
|               | Ovis aries             | NM_001100921.1 | 1428 | 475 |
|               | Bos taurus             | BC116098.1     | 1801 | 475 |
|               | Bubalus bubalis        | HQ270143.1     | 1624 | 505 |
|               | Sus scrofa             | NM_214379.1    | 1758 | 504 |
|               | Mus musculus           | U10374.1       | 1428 | 475 |
|               | Rattus norvegicus      | Y12882.2       | 1570 | 505 |
|               | Cavia porcellus        | XM_003462736.2 | 1431 | 475 |
|               | Octodon degus          | XM_004645604.1 | 1449 | 475 |

**Table S2 All of the predicted TFBS in human and in chicken**

| PPAR $\alpha$     |                | PPAR $\beta$   |                | PPAR $\gamma$  |                |
|-------------------|----------------|----------------|----------------|----------------|----------------|
| Homo sapiens      | Gallus gallus  | Homo sapiens   | Gallus gallus  | Homo sapiens   | Gallus gallus  |
| Sp1               | Oct-1          | NF-1           | p40x           | p40x           | Oct-1          |
| Oct-1             | C/EBP $\alpha$ | C/EBP $\alpha$ | GR             | Oct-1          | ICSBP          |
| GATA-1            | TBP            | Sp1            | C/EBP $\alpha$ | Zen-1          | GATA-1         |
| CREB              | AP-2 $\alpha$  | AP-2 $\alpha$  | ICSBP          | TBP            | Erg-1          |
| CPE_bind          | NF-1           | GR             | ISGF-3         | MEB-1          | C/EBP $\alpha$ |
| CP1               | GR             | Hb             | REV-ErbA       | Hb             | c-Jun          |
| NF-1              | HSTF           | p40x           | Sp1            | AP-2 $\alpha$  | c-Fos          |
| AP-2 $\alpha$     | Pit-1a         | AP-1           | AP-2 $\alpha$  | Sp1            | Pap1+          |
| GR                | Sp1            | GATA-1         | USF            | C/EBP $\alpha$ | AP-1           |
| Egr-1             | Hb             | TBP            | c-Fos          | YY1            | NF-1           |
| WT1               | GATA-1         | Pit-1a         | NF-1           | HNF-3B         | GR             |
| CACCC-bi          | SGF-1          | HSE-bind       | ACE2           | REB1           | HNF-3B         |
| MyoD              | HSE-bind       | HSF            | NF-E2          | ER             | SRF            |
| C/EBP $\alpha$    | Pit-1          | MBP-1_(1)      | c-Jun          | NF-1           | Dl             |
| GLI3              | NF-A           | NF-kappa       | AP-1           | Id3            | TBP            |
| ENKTF-1           | Elk-1          | NF-kappaB      | ITF-2          | HNF-1          | MAT $\alpha$ 2 |
| E1                | GCN4           | Kr             | MRF4           | NF-ATc3        | Hb             |
| ICSBP             | Antp           | ARP-1          | Id2            | USF            | Dfd            |
| Krox-20           | SRY            | ATF            | NF-kappaB      | CP1            | MEB-1          |
| ETF               | CoS            | Oct-1          | GATA-1         | GATA-1         | GLO            |
| MIG1              | MEB-1          | USF            | COUP           | LyF-1          | ATF            |
| RAR- $\alpha$     | GLO            | CeMyoD         | RAR- $\alpha$  | T3R            | Oct-21         |
| REV-ErbA $\alpha$ | CREB           | YY1            | RXR- $\alpha$  | ICSBP          | Eve            |
| CoS               | PU.1           | N-Myc          | ER             | RAP1           | Ftz            |
| NF-kappa          | SRF            | CP1            | c-Ets-1        | C/EBP $\delta$ | HNF-1C         |
| Adf-1             | ICSBP          | CTF            | SRF            | TSF3           | ER             |
| CTF               | HNF-3          | ETF            | PR             | c-Ets-1_       | PR             |
| RAP1              | NRL            | MIG1           | Ftz            | GR             | CREB           |
| NF-muE1           | NF-kappaB      | c-Jun          | Oct-1          | PR             | Pit-1          |
| Elk-1             | C/EBP $\beta$  | CRE-BP1        | IRF-1          | T3R- $\alpha$  | USF            |
| SRF               | SGF-3          | CREB           | REB1           | IRF-1          | E2             |
|                   | NF-ATc3        | CPE_bind       | YY1            | E1             | Pit-1a         |
|                   | RSRFC4         | Adf-1          | AP-2           | REV-ErbA       | AP-2 $\alpha$  |
|                   | CTF            | WT1            | Egr-1          | COUP           | c-Rel          |
|                   | Odd            | NF-muE1        | CPE_bind       | c-Jun          | TCF-1 $\alpha$ |
|                   | CeMyoD         | Krox-20        | ETF            | NF-kappaB      | Antp           |
|                   | PEA3           |                | ATF            | CPE_bind       | ISGF-3         |
|                   | Ftz            |                | EF1            | Dfd            | HNF-3          |
|                   | C/EBP          |                | CP1            | Ftz            | NF-EM5         |

|  |          |  |         |        |  |
|--|----------|--|---------|--------|--|
|  | CPC1     |  | CREB    | HNF-1C |  |
|  | AP-1     |  | WT1     |        |  |
|  | p40x     |  | CRE-BP1 |        |  |
|  | HNF-1C   |  | Adf-1   |        |  |
|  | CPE_bind |  | AhR     |        |  |
|  | Zen-1    |  |         |        |  |

**Table S3 The predicted miRNAs targets in PPAR gene family in human**

| miRNA           | Gene name                     |
|-----------------|-------------------------------|
| hsa-miR-128     | PPAR $\alpha$ , PPAR $\gamma$ |
| hsa-miR-27abc   | PPAR $\alpha$ , PPAR $\gamma$ |
| hsa-miR-454     | PPAR $\gamma$                 |
| hsa-miR-142-3p  | PPAR $\alpha$                 |
| hsa-miR-9       | PPAR $\alpha$ , PPAR $\beta$  |
| hsa-miR-17      | PPAR $\alpha$ , PPAR $\beta$  |
| hsa-miR-152     | PPAR $\beta$                  |
| hsa-miR-138     | PPAR $\beta$                  |
| hsa-miR-29abcd  | PPAR $\beta$                  |
| hsa-miR-873     | PPAR $\alpha$                 |
| hsa-miR-21      | PPAR $\alpha$                 |
| hsa-miR-22      | PPAR $\alpha$                 |
| hsa-miR-539     | PPAR $\alpha$                 |
| hsa-miR-202-3p  | PPAR $\alpha$                 |
| hsa-let-7       | PPAR $\alpha$                 |
| hsa-miR-93      | PPAR $\alpha$                 |
| hsa-miR-144     | PPAR $\alpha$                 |
| hsa-miR-19ab    | PPAR $\alpha$                 |
| hsa-miR-508     | PPAR $\alpha$                 |
| hsa-miR-141     | PPAR $\alpha$                 |
| hsa-miR-335     | PPAR $\alpha$                 |
| hsa-miR-24      | PPAR $\alpha$                 |
| hsa-miR-33ab    | PPAR $\alpha$                 |
| hsa-miR-125a-5p | PPAR $\alpha$                 |
| hsa-miR-124     | PPAR $\alpha$                 |
| hsa-miR-181abcd | PPAR $\alpha$                 |
| hsa-miR-101     | PPAR $\alpha$                 |
| hsa-miR-10abc   | PPAR $\alpha$                 |
